# Supplementary material for: A Duplication CNV That Conveys Traits Reciprocal to Metabolic Syndrome and Protects against Diet-Induced Obesity in Mice and Men
Source: PubMed Central journal article supplement (PMC3359973; doi:10.1371/journal.pgen.1002713), 2012-05-24

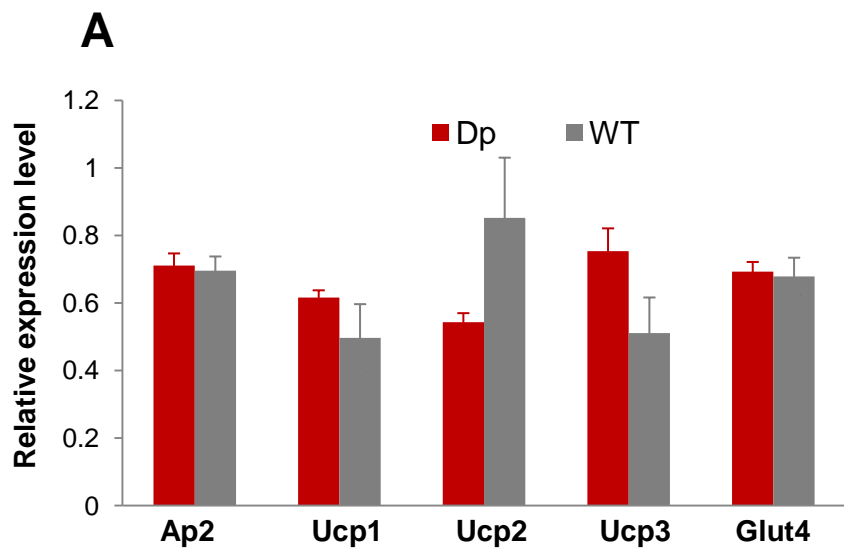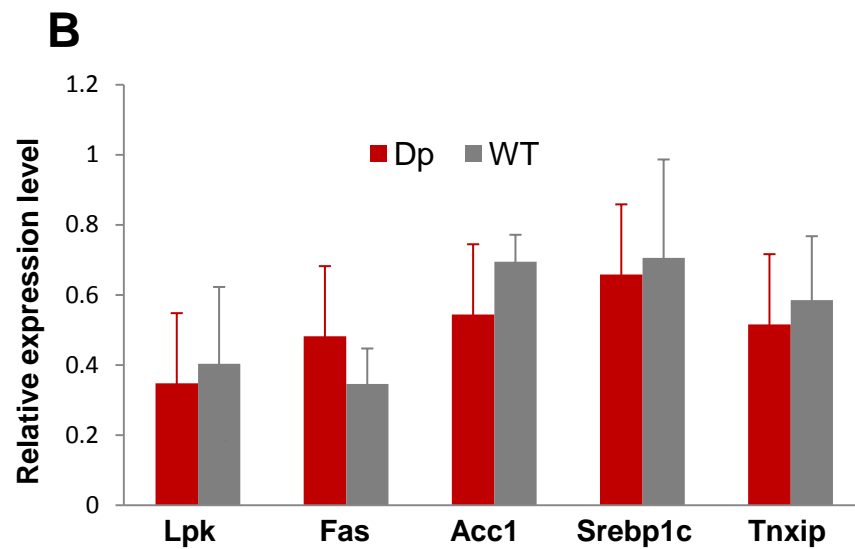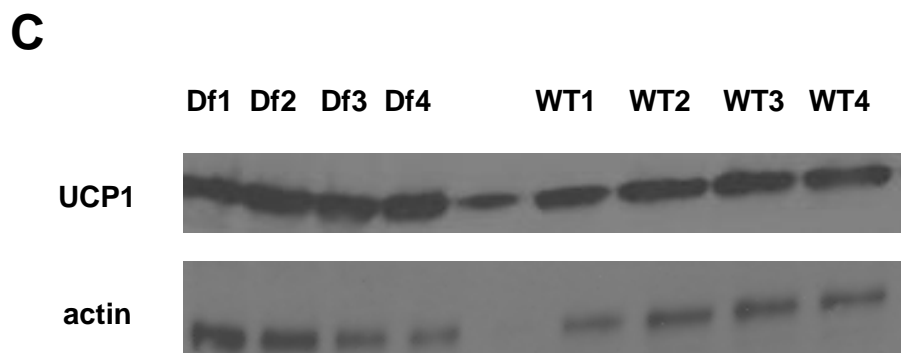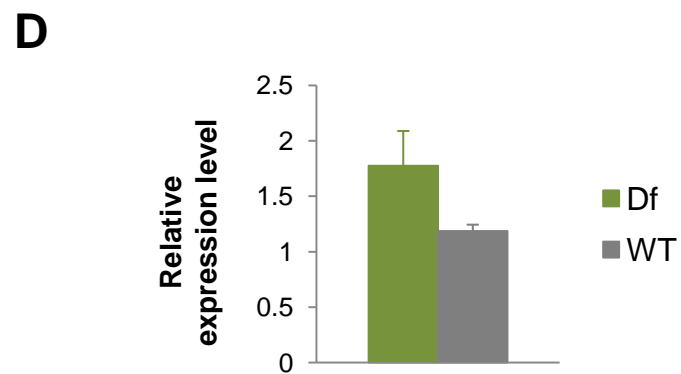

Supplement: pgen.1002713.s004.pdf [file pgen.1002713.s004.pdf]
