# Supplementary material for: A Duplication CNV That Conveys Traits Reciprocal to Metabolic Syndrome and Protects against Diet-Induced Obesity in Mice and Men
Source: PubMed Central journal article supplement (PMC3359973; doi:10.1371/journal.pgen.1002713), 2012-05-24
Supplement: pgen.1002713.s005.pdf [file pgen.1002713.s005.pdf]

Suppl Table 1: Serum chemistry comparison of *Dp(11)17/+* and WT mice

|                    | CREA<br>mg/dL       | Total protein<br>g/dL    | A/G ratio                 | ALT<br>U/L                     | AST<br>U/L         |
|--------------------|---------------------|--------------------------|---------------------------|--------------------------------|--------------------|
| <i>Dp(11)17 /+</i> | <b>0.12±0.02</b>    | <b>4.72±0.16</b>         | <b>1.96±0.21</b>          | <b>244±61.83</b>               | <b>478±121.67</b>  |
| WT                 | <b>0.1±0.00</b>     | <b>5.45±0.29</b>         | <b>1.88±0.03</b>          | <b>79.83±18.35</b>             | <b>230.5±47.08</b> |
| <i>p value</i>     | 0.373901            | 0.061238                 | 0.736871                  | 0.054534                       | 0.114108           |
|                    | ALP<br>U/L          | CK<br>U/L                | LDH<br>U/L                | BUN<br>mg/dL                   | Calcium<br>mg/dL   |
| <i>Dp(11)17 /+</i> | <b>70±19.32</b>     | <b>1125.4±875.61</b>     | <b>492.8±260.02</b>       | <b>20.1±1.19</b>               | <b>8.94±0.29</b>   |
| WT                 | <b>64.5±6.17</b>    | <b>778.17±166.62</b>     | <b>714±144.30</b>         | <b>19.72±0.92</b>              | <b>9.18±0.39</b>   |
| <i>p value</i>     | 0.797513            | 0.715426                 | 0.483535                  | 0.804964                       | 0.630496           |
|                    | Glucose<br>mg/dL    | Total Bilirubin<br>mg/dL | direct Bilirubin<br>mg/dL | indirect<br>Bilirubin<br>mg/dL | Magnesium<br>mg/dL |
| <i>Dp(11)17 /+</i> | <b>154±31.84</b>    | <b>0.246±0.06</b>        | <b>0.066±0.03</b>         | <b>0.2±0.03</b>                | <b>3.18±0.17</b>   |
| WT                 | <b>198.67±19.03</b> | <b>0.25±0.01</b>         | <b>0.028±0.01</b>         | <b>0.23±0.02</b>               | <b>3.35±0.12</b>   |
| <i>p value</i>     | 0.269486            | 0.99163                  | 0.314965                  | 0.408738                       | 0.434566           |
|                    | Phosphate<br>mg/dL  |                          |                           |                                |                    |
| <i>Dp(11)17 /+</i> | <b>9.16±1.10</b>    |                          |                           |                                |                    |
| WT                 | <b>7.85±0.39</b>    |                          |                           |                                |                    |
| <i>p value</i>     | 0.31187             |                          |                           |                                |                    |

CREA: Creatinine

A/G ratio: Albumin/globulin ratio

ALT: Alanine transaminase

AST: Aspartate transaminase

ALP: Alkaline phosphatase

CK: Creatine kinase

LDH: Lactate dehydrogenase

BUN: blood urea nitrogen

Tt/di/indi Bilirubin: total/direct(conjugated)/indirect bilirubin
